# Supplementary material for: Trends in Intake of Energy and Total Sugar from Sugar-Sweetened Beverages in the United States among Children and Adults, NHANES 2003–2016
Source: PubMed Central journal article supplement (PMC6770750; doi:10.3390/nu11092004), 2019-08-25
Supplement: nutrients-11-02004-s001.pdf [file nutrients-11-02004-s001.pdf]

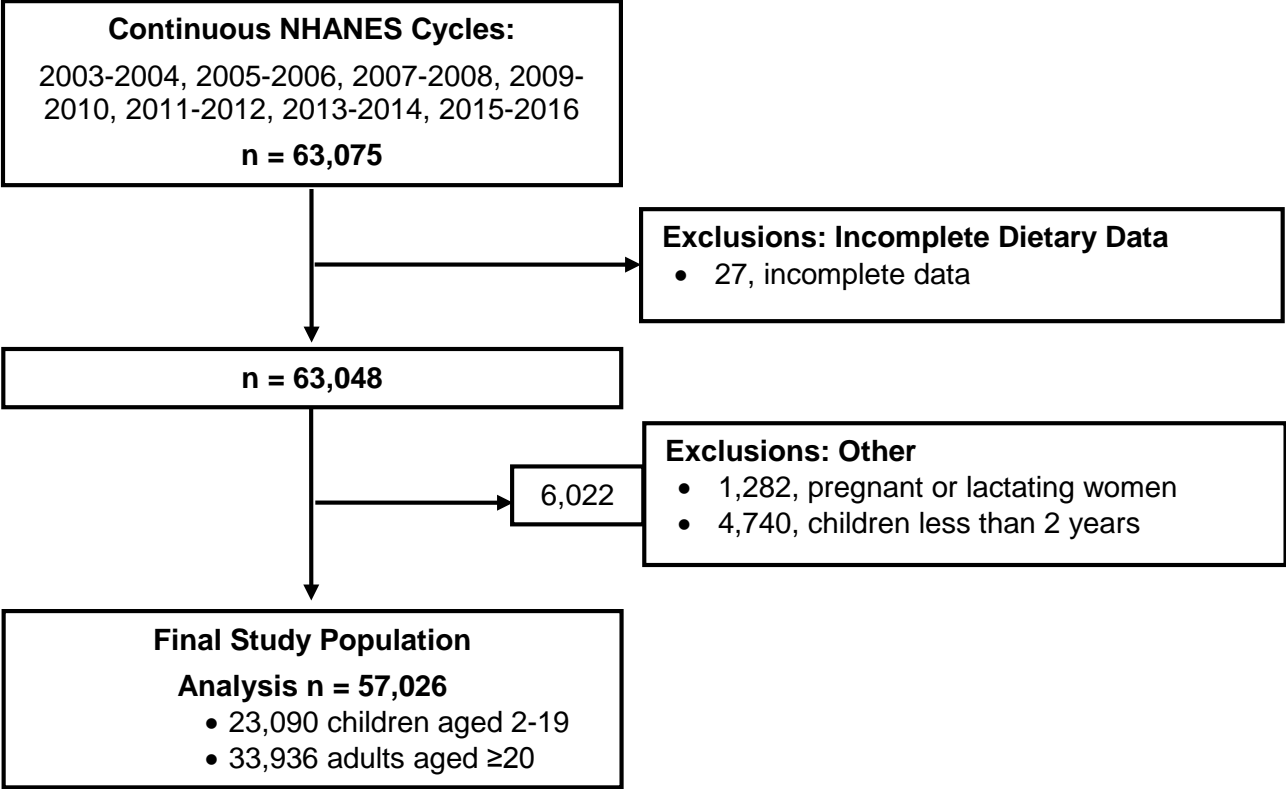

**Figure S1:** Flow chart defining study population and exclusions.

Table S1. Trends in Energy Intake over Time in the US by Age Groups <sup>1-3</sup>

|                                                    | 2003-2004 |      | 2005-2006 |      | 2007-2008 |      | 2009-2010 |      | 2011-2012 |      | 2013-2014 |      | 2015-2016 |      | p-value <sup>4</sup> |
|----------------------------------------------------|-----------|------|-----------|------|-----------|------|-----------|------|-----------|------|-----------|------|-----------|------|----------------------|
|                                                    | kcal/d    | SE   | kcal/d    | SE   | kcal/d    | SE   | kcal/d    | SE   | kcal/d    | SE   | kcal/d    | SE   | kcal/d    | SE   | <.0001               |
| <b>Energy intake from SSBs <sup>5</sup></b>        |           |      |           |      |           |      |           |      |           |      |           |      |           |      |                      |
| ≥2 years old                                       | 183.9     | 6.9  | 151.7     | 5.6  | 138.7     | 8.8  | 126.5     | 3.9  | 126.2     | 4.9  | 112.9     | 5.2  | 95.0      | 3.5  | <.0001               |
| 2-19 years old                                     | 210.7     | 8.4  | 180.5     | 10.7 | 151.0     | 6.5  | 140.0     | 7.7  | 133.3     | 6.3  | 111.2     | 5.1  | 94.2      | 3.3  | <.0001               |
| 6-11 years old                                     | 181.5     | 12.3 | 131.2     | 7.9  | 138.6     | 7.6  | 108.4     | 5.9  | 115.3     | 5.5  | 96.6      | 6.6  | 91.1      | 5.1  | <.0001               |
| 12-19 years old                                    | 277.8     | 10.8 | 261.8     | 18.5 | 197.3     | 10.7 | 199.1     | 15.0 | 177.6     | 10.4 | 148.0     | 6.6  | 120.5     | 6.1  | <.0001               |
| ≥20 years old                                      | 174.3     | 7.8  | 141.6     | 5.7  | 134.5     | 10.1 | 121.8     | 3.8  | 123.8     | 5.2  | 113.4     | 5.9  | 95.2      | 4.6  | <.0001               |
| <b>Energy intake from Soft Drinks <sup>5</sup></b> |           |      |           |      |           |      |           |      |           |      |           |      |           |      |                      |
| ≥2 years old                                       | 131.1     | 6.1  | 100.1     | 4.1  | 93.1      | 8.5  | 80.1      | 3.1  | 75.7      | 3.7  | 77.3      | 4.6  | 64.3      | 2.8  | <.0001               |
| 2-19 years old                                     | 131.8     | 6.6  | 103.3     | 7.6  | 87.3      | 6.8  | 75.7      | 5.5  | 66.9      | 4.4  | 61.4      | 4.4  | 52.7      | 3.0  | <.0001               |
| 6-11 years old                                     | 113.1     | 11.3 | 61.7      | 4.9  | 73.3      | 6.6  | 50.5      | 4.0  | 51.6      | 5.0  | 45.4      | 4.8  | 44.3      | 3.9  | <.0001               |
| 12-19 years old                                    | 192.9     | 10.3 | 170.0     | 13.8 | 128.0     | 11.9 | 124.0     | 10.4 | 101.3     | 7.7  | 94.6      | 8.1  | 78.4      | 5.1  | <.0001               |
| ≥20 years old                                      | 130.8     | 7.0  | 99.0      | 4.0  | 95.1      | 9.6  | 81.6      | 3.4  | 78.7      | 4.4  | 82.5      | 5.1  | 68.1      | 3.7  | <.0001               |
| <b>Energy intake from All Beverages</b>            |           |      |           |      |           |      |           |      |           |      |           |      |           |      |                      |
| ≥2 years old                                       | 444.8     | 9.0  | 404.2     | 10.9 | 374.1     | 7.9  | 384.0     | 6.3  | 381.5     | 8.0  | 351.9     | 10.7 | 322.9     | 6.9  | <.0001               |
| 2-19 years old                                     | 475.9     | 8.5  | 413.2     | 15.1 | 382.8     | 7.1  | 383.1     | 6.7  | 374.4     | 7.5  | 329.8     | 7.5  | 286.1     | 6.7  | <.0001               |
| 6-11 years old                                     | 443.0     | 16.5 | 354.8     | 16.6 | 359.7     | 9.7  | 346.2     | 7.8  | 343.9     | 10.8 | 314.0     | 7.2  | 282.1     | 10.1 | <.0001               |
| 12-19 years old                                    | 516.5     | 10.4 | 471.7     | 22.1 | 404.8     | 11.2 | 421.8     | 11.4 | 407.0     | 12.3 | 358.9     | 11.6 | 299.6     | 12.9 | <.0001               |
| ≥20 years old                                      | 433.7     | 11.4 | 401.1     | 11.8 | 371.0     | 9.9  | 384.3     | 7.4  | 384.0     | 9.5  | 359.1     | 12.3 | 334.8     | 9.4  | <.0001               |
| <b>Energy intake from Total Diet</b>               |           |      |           |      |           |      |           |      |           |      |           |      |           |      |                      |
| ≥2 years old                                       | 2203.9    | 15.5 | 2159.9    | 29.6 | 2072.5    | 24.8 | 2082.1    | 13.7 | 2141.3    | 12.6 | 2078.4    | 16.1 | 2050.4    | 18.7 | <.0001               |
| 2-19 years old                                     | 2138.0    | 19.9 | 2053.5    | 34.2 | 1937.8    | 23.2 | 1929.4    | 21.9 | 1983.6    | 22.8 | 1884.9    | 21.1 | 1868.8    | 25.1 | <.0001               |
| 6-11 years old                                     | 2121.4    | 49.7 | 1985.1    | 35.6 | 1928.0    | 27.9 | 1869.0    | 20.4 | 1986.8    | 30.7 | 1920.6    | 35.4 | 1907.4    | 28.2 | .0001                |
| 12-19 years old                                    | 2350.1    | 41.2 | 2338.7    | 46.7 | 2145.0    | 32.9 | 2167.3    | 43.6 | 2175.0    | 44.9 | 2037.9    | 31.1 | 2032.0    | 51.7 | <.0001               |
| ≥20 years old                                      | 2227.5    | 17.0 | 2197.5    | 34.0 | 2119.4    | 30.0 | 2134.5    | 20.7 | 2194.9    | 15.8 | 2141.2    | 17.3 | 2109.1    | 21.3 | <.0001               |

<sup>1</sup> Mean ± standard error (SE) is shown for all values. <sup>2</sup> Data source: NHANES dietary data over 7 cycles (2003-2016) was used (n=57,026; n=5534 children aged 2-5, n=7378 children aged 6-11, n=10,178 children aged 12-18, n=33,936 adults aged ≥20). <sup>3</sup> Estimates for adults aged ≥20 years were age-adjusted by the direct method to the year 2010 US Census Population. <sup>4</sup> All tests for significance for a linear trend were obtained using linear regression for survey data. <sup>5</sup> SSBs (sugar-sweetened beverages) were defined as soft drinks, sports drinks, energy drinks, and fruit drinks, excluding sports beverages with protein, sweetened teas/coffees, and other items. Soft drinks were defined as regular sweetened carbonated soda. US, United States; SE standard error; SSBs, sugar-sweetened beverages.

Table S2. Trends in Total Sugar Intake over Time in the US by Age Groups <sup>1-3</sup>

|                                                         | 2003-2004 |     | 2005-2006 |     | 2007-2008 |     | 2009-2010 |     | 2011-2012 |     | 2013-2014 |     | 2015-2016 |     | p-value <sup>4</sup><br><.0001 |
|---------------------------------------------------------|-----------|-----|-----------|-----|-----------|-----|-----------|-----|-----------|-----|-----------|-----|-----------|-----|--------------------------------|
|                                                         | g         | SE  | g         | SE  | g         | SE  | g         | SE  | g         | SE  | g         | SE  | g         | SE  |                                |
| <b>Total Sugar intake from SSBs <sup>5</sup></b>        |           |     |           |     |           |     |           |     |           |     |           |     |           |     |                                |
| ≥2 years old                                            | 43.6      | 1.7 | 35.6      | 1.3 | 32.6      | 2.1 | 29.9      | 0.9 | 29.5      | 1.1 | 26.5      | 1.3 | 22.3      | 0.8 | <.0001                         |
| 2-19 years old                                          | 49.6      | 1.9 | 42.0      | 2.5 | 35.3      | 1.6 | 32.9      | 1.8 | 31.2      | 1.5 | 26.1      | 1.2 | 22.0      | 0.8 | <.0001                         |
| 6-11 years old                                          | 42.6      | 3.0 | 30.4      | 1.8 | 32.3      | 1.9 | 25.4      | 1.4 | 27.0      | 1.3 | 22.7      | 1.6 | 21.0      | 1.2 | <.0001                         |
| 12-19 years old                                         | 65.7      | 2.5 | 61.2      | 4.4 | 46.3      | 2.7 | 46.9      | 3.6 | 41.8      | 2.5 | 34.9      | 1.6 | 28.4      | 1.5 | <.0001                         |
| ≥20 years old                                           | 41.5      | 1.9 | 33.4      | 1.4 | 31.7      | 2.4 | 28.8      | 0.9 | 28.9      | 1.3 | 26.7      | 1.4 | 22.3      | 1.1 | <.0001                         |
| <b>Total Sugar intake from Soft Drinks <sup>5</sup></b> |           |     |           |     |           |     |           |     |           |     |           |     |           |     |                                |
| ≥2 years old                                            | 31.6      | 1.5 | 24.2      | 1.0 | 22.5      | 2.1 | 19.3      | 0.8 | 18.1      | 0.9 | 18.7      | 1.1 | 15.4      | 0.7 | <.0001                         |
| 2-19 years old                                          | 31.7      | 1.6 | 24.8      | 1.8 | 21.1      | 1.6 | 18.2      | 1.3 | 16.0      | 1.0 | 14.8      | 1.1 | 12.5      | 0.7 | <.0001                         |
| 6-11 years old                                          | 27.1      | 2.7 | 14.7      | 1.2 | 17.6      | 1.6 | 12.1      | 1.0 | 12.2      | 1.2 | 10.9      | 1.2 | 10.5      | 0.9 | <.0001                         |
| 12-19 years old                                         | 46.4      | 2.4 | 40.9      | 3.3 | 31.0      | 2.9 | 29.8      | 2.5 | 24.3      | 1.8 | 22.9      | 1.9 | 18.7      | 1.2 | <.0001                         |
| ≥20 years old                                           | 31.6      | 1.7 | 24.0      | 1.0 | 23.0      | 2.3 | 19.7      | 0.8 | 18.8      | 1.1 | 19.9      | 1.2 | 16.4      | 0.9 | <.0001                         |
| <b>Total Sugar intake from All Beverages</b>            |           |     |           |     |           |     |           |     |           |     |           |     |           |     |                                |
| ≥2 years old                                            | 69.8      | 1.8 | 60.3      | 1.8 | 56.1      | 2.0 | 56.3      | 1.0 | 55.0      | 1.4 | 50.4      | 1.4 | 45.8      | 1.4 | <.0001                         |
| 2-19 years old                                          | 84.7      | 1.8 | 73.4      | 2.9 | 65.8      | 1.6 | 66.1      | 1.3 | 64.6      | 1.2 | 55.9      | 1.5 | 47.9      | 1.2 | <.0001                         |
| 6-11 years old                                          | 77.5      | 3.2 | 60.5      | 3.0 | 62.7      | 1.9 | 58.0      | 1.5 | 59.0      | 1.8 | 52.5      | 1.4 | 46.7      | 1.6 | <.0001                         |
| 12-19 years old                                         | 96.2      | 1.9 | 88.7      | 4.5 | 72.9      | 2.6 | 77.6      | 2.5 | 73.8      | 2.2 | 63.7      | 2.2 | 52.8      | 2.1 | <.0001                         |
| ≥20 years old                                           | 64.5      | 2.2 | 55.7      | 1.9 | 52.8      | 2.4 | 52.9      | 1.0 | 51.8      | 1.4 | 48.6      | 1.4 | 45.2      | 1.6 | <.0001                         |
| <b>Total Sugar intake from Total Diet</b>               |           |     |           |     |           |     |           |     |           |     |           |     |           |     |                                |
| ≥2 years old                                            | 132.7     | 1.6 | 124.1     | 2.3 | 119.8     | 1.9 | 119.1     | 1.1 | 120.0     | 1.3 | 111.9     | 1.3 | 106.1     | 1.5 | <.0001                         |
| 2-19 years old                                          | 147.8     | 2.2 | 138.3     | 3.0 | 128.2     | 1.7 | 127.0     | 1.6 | 128.1     | 1.8 | 114.3     | 1.7 | 108.3     | 2.1 | <.0001                         |
| 6-11 years old                                          | 147.3     | 5.3 | 133.2     | 3.5 | 131.3     | 3.1 | 123.4     | 1.7 | 129.8     | 2.1 | 117.5     | 2.4 | 111.2     | 2.5 | .0001                          |
| 12-19 years old                                         | 157.2     | 2.8 | 152.3     | 4.9 | 134.5     | 2.8 | 138.1     | 2.5 | 135.0     | 3.4 | 119.8     | 2.6 | 114.2     | 4.0 | <.0001                         |
| ≥20 years old                                           | 127.3     | 1.7 | 119.1     | 2.6 | 116.4     | 2.5 | 116.4     | 1.3 | 117.2     | 1.5 | 111.2     | 1.3 | 105.4     | 1.6 | <.0001                         |

<sup>1</sup> Mean ± standard error (SE) is shown for all values. <sup>2</sup> Data source: NHANES dietary data over 7 cycles (2003-2016) was used (n=57,026; n=5534 children aged 2-5, n=7378 children aged 6-11, n=10,178 children aged 12-18, n=33,936 adults aged ≥20). <sup>3</sup> Estimates for adults aged ≥20 years were age-adjusted by the direct method to the year 2010 US Census Population. <sup>4</sup> All tests for significance for a linear trend were obtained using linear regression for survey data. <sup>5</sup> SSBs (sugar-sweetened beverages) were defined as soft drinks, sports drinks, energy drinks, and fruit drinks, excluding sports beverages with protein, sweetened teas/coffees, and other items. Soft drinks were defined as regular sweetened carbonated soda. US, United States; SE, standard error; SSBs, sugar-sweetened beverages.

Table S3. Percentage SSB Consumers/Non-consumers of Total US Population over Time by Age Groups and Tiers of SSB Consumption<sup>1-3</sup>

|                            | 2003-2004 |     | 2005-2006 |     | 2007-2008 |     | 2009-2010 |     | 2011-2012 |     | 2013-2014 |     | 2015-2016 |     | p-value <sup>4</sup> |
|----------------------------|-----------|-----|-----------|-----|-----------|-----|-----------|-----|-----------|-----|-----------|-----|-----------|-----|----------------------|
| <b>Ages ≥2 years (n)</b>   | 7880      |     | 8112      |     | 8448      |     | 8943      |     | 7852      |     | 7972      |     | 7819      |     |                      |
|                            | %         | SE  | %         | SE  | %         | SE  | %         | SE  | %         | SE  | %         | SE  | %         | SE  |                      |
| 0 ounces                   | 40.3      | 1.3 | 47.8      | 1.2 | 48.4      | 1.3 | 52.5      | 1.0 | 51.2      | 1.5 | 55.3      | 1.2 | 58.2      | 1.3 | <.0001               |
| >0-12 ounces               | 12.5      | 0.5 | 13.2      | 0.7 | 13.7      | 0.7 | 12.7      | 0.5 | 13.5      | 0.5 | 13.1      | 0.6 | 14.3      | 0.8 | .4768                |
| >12-24 ounces              | 21.6      | 0.7 | 17.3      | 0.7 | 18.1      | 0.6 | 17.4      | 0.6 | 18.1      | 0.9 | 17.3      | 0.7 | 15.8      | 0.6 | <.0001               |
| >24 ounces                 | 25.6      | 1.0 | 21.7      | 1.2 | 19.8      | 1.4 | 17.4      | 0.4 | 17.2      | 0.8 | 14.3      | 0.8 | 11.7      | 0.5 | <.0001               |
| <b>Ages 2-19 years (n)</b> | 3700      |     | 3949      |     | 3109      |     | 3280      |     | 3132      |     | 3020      |     | 2900      |     |                      |
|                            | %         | SE  | %         | SE  | %         | SE  | %         | SE  | %         | SE  | %         | SE  | %         | SE  |                      |
| 0 ounces                   | 23.1      | 1.7 | 31.6      | 1.6 | 33.8      | 1.7 | 39.8      | 1.4 | 37.5      | 2.2 | 45.8      | 1.3 | 45.8      | 1.2 | <.0001               |
| >0-12 ounces               | 20.9      | 1.0 | 21.0      | 1.4 | 24.1      | 1.2 | 21.3      | 1.0 | 23.1      | 1.2 | 22.0      | 0.7 | 24.5      | 1.6 | .2086                |
| >12-24 ounces              | 26.9      | 1.1 | 22.8      | 0.9 | 21.7      | 1.3 | 21.3      | 1.6 | 22.9      | 1.3 | 18.8      | 0.9 | 19.5      | 0.9 | <.0001               |
| >24 ounces                 | 29.1      | 1.6 | 24.6      | 1.9 | 20.4      | 1.1 | 17.6      | 1.3 | 16.4      | 1.1 | 13.3      | 1.0 | 10.1      | 0.9 | <.0001               |
| <b>Ages ≥20 years (n)</b>  | 4180      |     | 4163      |     | 5336      |     | 5663      |     | 4720      |     | 4952      |     | 4919      |     |                      |
|                            | %         | SE  | %         | SE  | %         | SE  | %         | SE  | %         | SE  | %         | SE  | %         | SE  |                      |
| 0 ounces                   | 46.5      | 1.3 | 53.6      | 1.3 | 53.5      | 1.3 | 56.9      | 1.0 | 55.8      | 1.5 | 58.4      | 1.3 | 62.2      | 1.4 | <.0001               |
| >0-12 ounces               | 9.5       | 0.5 | 10.5      | 0.7 | 10.0      | 0.7 | 9.7       | 0.6 | 10.3      | 0.5 | 10.2      | 0.6 | 11.0      | 0.7 | .6809                |
| >12-24 ounces              | 19.7      | 0.7 | 15.3      | 1.0 | 16.9      | 0.9 | 16.0      | 0.7 | 16.5      | 0.8 | 16.8      | 0.8 | 14.6      | 0.7 | .0002                |
| >24 ounces                 | 24.3      | 1.0 | 20.6      | 1.2 | 19.6      | 1.7 | 17.4      | 0.6 | 17.4      | 0.9 | 14.7      | 0.9 | 12.2      | 0.7 | <.0001               |

<sup>1</sup> Total N and mean percentage ± standard error (SE) are shown for all values. <sup>2</sup> Data source: NHANES dietary data over 7 cycles (2003-2016) was used n=57,026; 23,090 children aged 2-19, n=33,936 adults aged ≥20). <sup>3</sup> SSBs (sugar-sweetened beverages) were defined as soft drinks, sports drinks, energy drinks, and fruit drinks, excluding sports beverages with protein, sweetened teas/coffees, and other items. <sup>4</sup> Estimates for adults aged ≥20 years were age-adjusted by the direct method to the year 2010 US Census Population. <sup>5</sup> Tests for significance for a linear trend were obtained using logistic regression for survey data. SSBs, sugar-sweetened beverages; US, United States; SE, standard error.
